# Supplementary material for: Standardization of health outcomes assessment for depression and anxiety: recommendations from the ICHOM Depression and Anxiety Working Group
Source: Springer Nature journal article supplement (doi:10.1007/s11136-017-1659-5), 2017-08-07
Supplement: MOESM1 [file 13444840]

# Standardization of health outcome assessment for depression and anxiety: recommendations from the ICHOM Depression and Anxiety

## Working Group - Appendix

### Authors:

Alexander Obbarius\*; Lisa van Maasackers; Lee Baer; David M. Clark; Anne G. Crocker; Edwin de Beurs; Paul M. G. Emmelkamp; Toshi A. Furukawa; Erik Hedman; Maria Kangas; Lucie Langford; Alain Lesage; Doris M. Mwesigire; Sandra Nolte; Vikram Patel; Paul A. Pilkonis; Harold A. Pincus; Roberta A. Reis; Graciela Rojas; Cathy Sherbourne; Dave Smithson; Caleb Stowell; Kelly Woolaway-Bickel; Matthias Rose.

### \*Corresponding author:

Alexander Obbarius, MD

### Postal Address:

Department of Psychosomatic Medicine

Charité – Universitätsmedizin Berlin

Hindenburgdamm 30

12203 Berlin

Germany

### Telephone:

+4930450653890

### Fax:

+4930450553900

### Email:

alexander.obbarius@charite.de

| Appendix 1: Preliminary list (n = 80) of instruments considered for the D+A Standard Set |                                                   |                                                                                                                                                                                                                                                                    |
|------------------------------------------------------------------------------------------|---------------------------------------------------|--------------------------------------------------------------------------------------------------------------------------------------------------------------------------------------------------------------------------------------------------------------------|
| Instrument                                                                               | Full Name                                         | Reference                                                                                                                                                                                                                                                          |
| <i>Depression (n = 29)</i>                                                               |                                                   |                                                                                                                                                                                                                                                                    |
| BDI                                                                                      | Beck Depression Inventory                         | Beck, A. T., Ward, C. H., Mendelson, M., Mock, J., & Erbaugh, J. (1961). An inventory for measuring depression. <i>Arch Gen Psychiatry, 4</i> , 561-571.                                                                                                           |
| BDI - FS                                                                                 | Beck Depression Inventory-FastScreen              | Beck, A. T., Steer, R. A., & Brown, G. K. (2000). <i>Manual for the Beck Depression Inventory-Fast Screen for medical patients</i> . San Antonio, TX: Psychological Corporation.                                                                                   |
| BDI-II                                                                                   | Beck Depression Inventory - II                    | Beck, A. T., Steer, R. A., & Brown, G. K. (1996). <i>Manual for the Beck Depression Inventory-II</i> . San Antonio, TX: Psychological Corporation.                                                                                                                 |
| BSI Depression                                                                           | Brief Symptom Inventory - Depression              | Derogatis, L. R., & Melisaratos, N. (1983). The Brief Symptom Inventory: an introductory report. <i>Psychol Med, 13</i> (3), 595-605.                                                                                                                              |
| CDS                                                                                      | Carroll Rating Scale for Depression               | Carroll, B. J., Feinberg, M., Smouse, P. E., Rawson, S. G., & Greden, J. F. (1981). The Carroll rating scale for depression. I. Development, reliability and validation. <i>Br J Psychiatry, 138</i> , 194-200.                                                    |
| CES-D                                                                                    | Center for Epidemiologic Studies Depression Scale | Radloff, L. S. (1977). The CES-D Scale: A self-report depression scale for research in the general population. <i>Applied Psychological Measurement, 1</i> , 385-401, doi:10.1177/014662167700100306.                                                              |
| CMDQ                                                                                     | Common Mental Disorder Questionnaire              | Christensen, K. S., Fink, P., Toft, T., Frostholm, L., Ornbol, E., & Olesen, F. (2005). A brief case-finding questionnaire for common mental disorders: the CMDQ. <i>Fam Pract, 22</i> (4), 448-457, doi:10.1093/fampra/cmi025.                                    |
| DASS                                                                                     | Depression Anxiety Stress Scales                  | Lovibond, S. H., & Lovibond, P. F. (1995). <i>Manual for the Depression Anxiety Stress Scales</i> (2nd ed.). Sydney: Psychological Foundation.                                                                                                                     |
| DASS-21                                                                                  | Depression Anxiety Stress Scales Short Form       | Henry, J. D., & Crawford, J. R. (2005). The short-form version of the Depression Anxiety Stress Scales (DASS-21): construct validity and normative data in a large non-clinical sample. <i>Br J Clin Psychol, 44</i> (Pt 2), 227-239, doi:10.1348/014466505X29657. |
| DUKE-AD                                                                                  | Duke Anxiety - Depression Scale                   | Parkerson, G. R., Jr., Broadhead, W. E., & Tse, C. K. (1990). The Duke Health Profile. A 17-item measure of health and dysfunction. <i>Med Care, 28</i> (11), 1056-1072.                                                                                           |
| GRID-HAMD                                                                                | GRID Hamilton Depression Rating Scale             | Williams, J. B., Kobak, K. A., Bech, P., Engelhardt, N., Evans, K., Lipsitz, J., et al. (2008). The GRID-HAMD: standardization of the Hamilton Depression Rating Scale. <i>Int Clin Psychopharmacol, 23</i> (3), 120-129, doi:10.1097/YIC.0b013e3282f948f5.        |
| HADS                                                                                     | Hospital Anxiety and Depression Scale             | Zigmond, A. S., & Snaith, R. P. (1983). The hospital anxiety and depression scale. <i>Acta Psychiatr Scand, 67</i> (6), 361-370.                                                                                                                                   |
| HAM-D                                                                                    | Hamilton Rating Scale for Depression              | Hamilton, M. (1960). A rating scale for depression. <i>J Neurol Neurosurg Psychiatry, 23</i> , 56-62.                                                                                                                                                              |
| HANDS                                                                                    | Harvard Department of Psychiatry/NDSD scale       | Baer, L., Jacobs, D. G., Meszler-Reizes, J., Blais, M., Fava, M., Kessler, R., et al. (2000). Development of a brief screening instrument: the HANDS. <i>Psychother Psychosom, 69</i> (1), 35-41, doi:12364.                                                       |
| IDS                                                                                      | Inventory of Depressive Symptomatology            | Rush, A. J., Gullion, C. M., Basco, M. R., Jarrett, R. B., & Trivedi, M. H. (1996). The Inventory of Depressive Symptomatology (IDS): psychometric properties. <i>Psychol Med, 26</i> (3), 477-486.                                                                |
| ISR Depression                                                                           | ICD-10-Symptom-Rating - Depression                | Tritt, K., von Heymann, F., Zaudig, M., Zacharias, I., Sollner, W., & Loew, T. (2008). [Development of the "ICD-10-Symptom-Rating"(ISR) questionnaire]. <i>Z Psychosom Med Psychother, 54</i> (4), 409-418, doi:10.13109/zptm.2008.54.4.409.                       |
| MACL                                                                                     | Mood Adjective Checklist                          | Nowlis, V. (1966). <i>Development of a Mood Adjective Check List (macl)</i> . Rochester, NY: Defense Technical Information Center.                                                                                                                                 |
| MADRS-S                                                                                  | Montgomery Asberg Depression Rating Scale         | Montgomery, S. A., & Asberg, M. (1979). A new depression scale designed to be sensitive to change. <i>Br J Psychiatry, 134</i> , 382-389.                                                                                                                          |

|                         |                                                                                          |                                                                                                                                                                                                                                                                                                                                                   |
|-------------------------|------------------------------------------------------------------------------------------|---------------------------------------------------------------------------------------------------------------------------------------------------------------------------------------------------------------------------------------------------------------------------------------------------------------------------------------------------|
| MDI                     | Major Depression Inventory                                                               | Bech, P., Rasmussen, N. A., Olsen, L. R., Noerholm, V., & Abildgaard, W. (2001). The sensitivity and specificity of the Major Depression Inventory, using the Present State Examination as the index of diagnostic validity. <i>J Affect Disord</i> , <i>66</i> (2-3), 159-164.                                                                   |
| MHI-5                   | Mental Health Index                                                                      | Berwick, D. M., Murphy, J. M., Goldman, P. A., Ware, J. E., Jr., Barsky, A. J., & Weinstein, M. C. (1991). Performance of a five-item mental health screening test. <i>Med Care</i> , <i>29</i> (2), 169-176.                                                                                                                                     |
| PHQ-2                   | Patient Health Questionnaire - 2 Items                                                   | Lowe, B., Kroenke, K., & Grafe, K. (2005). Detecting and monitoring depression with a two-item questionnaire (PHQ-2). <i>J Psychosom Res</i> , <i>58</i> (2), 163-171, doi:10.1016/j.jpsychores.2004.09.006.                                                                                                                                      |
| PHQ-9                   | Patient Health Questionnaire - 9 Items                                                   | Kroenke, K., Spitzer, R. L., & Williams, J. B. (2001). The PHQ-9: validity of a brief depression severity measure. <i>J Gen Intern Med</i> , <i>16</i> (9), 606-613.                                                                                                                                                                              |
| PROMIS-Short Form 4     | Patient-Reported Outcomes Measurement Information System - Depression Short Form 4 Items | Choi, S. W., Reise, S. P., Pilkonis, P. A., Hays, R. D., & Cella, D. (2010). Efficiency of static and computer adaptive short forms compared to full-length measures of depressive symptoms. <i>Qual Life Res</i> , <i>19</i> (1), 125-136, doi:10.1007/s11136-009-9560-5.                                                                        |
| PROMIS-Short Form 6     | Patient-Reported Outcomes Measurement Information System - Depression Short Form 6 Items |                                                                                                                                                                                                                                                                                                                                                   |
| PROMIS-Short Form 8     | Patient-Reported Outcomes Measurement Information System - Depression Short Form 8 Items |                                                                                                                                                                                                                                                                                                                                                   |
| QIDS-SR                 | Quick Inventory of Depressive Symptomatology - self report                               | Rush, A. J., Trivedi, M. H., Ibrahim, H. M., Carmody, T. J., Arnow, B., Klein, D. N., et al. (2003). The 16-Item Quick Inventory of Depressive Symptomatology (QIDS), clinician rating (QIDS-C), and self-report (QIDS-SR): a psychometric evaluation in patients with chronic major depression. <i>Biol Psychiatry</i> , <i>54</i> (5), 573-583. |
| RDS                     | Rand 8-item Depression Screener                                                          | Burnam, M. A., Wells, K. B., Leake, B., & Landsverk, J. (1988). Development of a brief screening instrument for detecting depressive disorders. <i>Med Care</i> , <i>26</i> (8), 775-789.                                                                                                                                                         |
| SDS                     | Zung Self-Rating Depression Scale                                                        | Zung, W. W. (1965). A Self-Rating Depression Scale. <i>Arch Gen Psychiatry</i> , <i>12</i> , 63-70.                                                                                                                                                                                                                                               |
| WHO-5                   | WHO-Five Well-being Index                                                                | Bech, P., Gudex, C., & Johansen, K. S. (1996). The WHO (Ten) Well-Being Index: validation in diabetes. <i>Psychother Psychosom</i> , <i>65</i> (4), 183-190.                                                                                                                                                                                      |
| <i>Anxiety (n = 32)</i> |                                                                                          |                                                                                                                                                                                                                                                                                                                                                   |
| ACQ                     | Agoraphobic Cognitions Questionnaire                                                     | Chambless, D. L., Caputo, G. C., Bright, P., & Gallagher, R. (1984). Assessment of fear of fear in agoraphobics: the body sensations questionnaire and the agoraphobic cognitions questionnaire. <i>J Consult Clin Psychol</i> , <i>52</i> (6), 1090-1097.                                                                                        |
| ADDQ                    | Anxiety Disorder Diagnostic Questionnaire                                                | Norton, P. J., & Robinson, C. M. (2010). Development and evaluation of the anxiety disorder diagnostic questionnaire. <i>Cogn Behav Ther</i> , <i>39</i> (2), 137-149, doi:10.1080/16506070903140430.                                                                                                                                             |
| ASQ-15                  | Anxiety Screening Questionnaire                                                          | Wittchen, H. U., & Boyer, P. (1998). Screening for anxiety disorders. Sensitivity and specificity of the Anxiety Screening Questionnaire (ASQ-15). <i>Br J Psychiatry Suppl</i> (34), 10-17.                                                                                                                                                      |
| BAI                     | Beck Anxiety Inventory                                                                   | Beck, A. T., Epstein, N., Brown, G., & Steer, R. A. (1988). An inventory for measuring clinical anxiety: psychometric properties. <i>J Consult Clin Psychol</i> , <i>56</i> (6), 893-897.                                                                                                                                                         |
| FQ                      | Fear Questionnaire                                                                       | Van Zuuren, F. J. (1988). The fear questionnaire. Some data on validity, reliability and layout. <i>Br J Psychiatry</i> , <i>153</i> , 659-662.                                                                                                                                                                                                   |
| GAD-7                   | General Anxiety Disorder                                                                 | Spitzer, R. L., Kroenke, K., Williams, J. B., & Lowe, B. (2006). A brief measure for assessing generalized anxiety disorder: the GAD-7. <i>Arch Intern Med</i> , <i>166</i> (10), 1092-1097, doi:10.1001/archinte.166.10.1092.                                                                                                                    |
| Ham-A                   | Hamilton Anxiety Scale                                                                   | Hamilton, M. (1959). The assessment of anxiety states by rating. <i>Br J Med Psychol</i> , <i>32</i> (1), 50-55.                                                                                                                                                                                                                                  |
| IES-R                   | Impact of Events Scale Revised                                                           | Weiss, D. S., & Marmar, C. R. (1997). The Impact of Event Scale-Revised. In J. P. Wilson, & T. M. Keane (Eds.), <i>Assessing psychological trauma and PTSD</i> (pp. 399-411). New York: Guilford Press.                                                                                                                                           |

|                     |                                                                                          |                                                                                                                                                                                                                                                                                                                                  |
|---------------------|------------------------------------------------------------------------------------------|----------------------------------------------------------------------------------------------------------------------------------------------------------------------------------------------------------------------------------------------------------------------------------------------------------------------------------|
| LSAS-SR             | Liebowitz Social Anxiety Scale - self reported                                           | Liebowitz, M. R. (1987). Social phobia. <i>Mod Probl Pharmacopsychiatry</i> , 22, 141-173.                                                                                                                                                                                                                                       |
| MASQ                | Mood and Anxiety Symptoms Questionnaire                                                  | Watson, D., Weber, K., Assenheimer, J. S., Clark, L. A., Strauss, M. E., & McCormick, R. A. (1995). Testing a tripartite model: I. Evaluating the convergent and discriminant validity of anxiety and depression symptom scales. <i>J Abnorm Psychol</i> , 104(1), 3-14.                                                         |
| MI                  | Mobility Inventory                                                                       | Chambless, D. L., Caputo, G. C., Jasin, S. E., Gracely, E. J., & Williams, C. (1985). The Mobility Inventory for Agoraphobia. <i>Behav Res Ther</i> , 23(1), 35-44.                                                                                                                                                              |
| Mini-SPIN           | Social Phobia Inventory - Abbreviated Version                                            | Connor, K. M., Kobak, K. A., Churchill, L. E., Katzelnick, D., & Davidson, J. R. (2001). Mini-SPIN: A brief screening assessment for generalized social anxiety disorder. <i>Depress Anxiety</i> , 14(2), 137-140.                                                                                                               |
| OCI                 | Obsessive Compulsive Inventory                                                           | Foa, E. B., Kozak, M. J., Salkovskis, P. M., Coles, M. E., & Amir, N. (1998). The validation of a new obsessive-compulsive disorder scale: The Obsessive-Compulsive Inventory. <i>Psychol Assess</i> , 10(3), 206-214.                                                                                                           |
| PAI                 | Panic Appraisal Inventory                                                                | Feske, U., & de Beurs, E. (1997). The Panic Appraisal Inventory: psychometric properties. <i>Behav Res Ther</i> , 35(9), 875-882.                                                                                                                                                                                                |
| PAS                 | Panic and Agoraphobia Scale                                                              | Bandelow, B. (1995). Assessing the efficacy of treatments for panic disorder and agoraphobia. II. The Panic and Agoraphobia Scale. <i>Int Clin Psychopharmacol</i> , 10(2), 73-81.                                                                                                                                               |
| PCL                 | PTSD checklist                                                                           | Blanchard, E. B., Jones-Alexander, J., Buckley, T. C., & Forneris, C. A. (1996). Psychometric properties of the PTSD Checklist (PCL). <i>Behav Res Ther</i> , 34(8), 669-673.                                                                                                                                                    |
| PDS                 | Posttraumatic Diagnostic Scale                                                           | Foa, E. B., Cashman, L., Jaycox, L., & Perry, K. (1997). The validation of a self-report measure of posttraumatic stress disorder: The Posttraumatic Diagnostic Scale. <i>Psychol Assess</i> , 9, 445-451.                                                                                                                       |
| PDSS-SR             | Panic Disorder Severity Scale- Self Report                                               | Houck, P. R., Spiegel, D. A., Shear, M. K., & Rucci, P. (2002). Reliability of the self-report version of the panic disorder severity scale. <i>Depress Anxiety</i> , 15(4), 183-185, doi:10.1002/da.10049.                                                                                                                      |
| PROMIS-Short Form 4 | Patient-Reported Outcomes Measurement Information System - Anxiety Short Form 4 Items    | Pilkonis, P. A., Choi, S. W., Reise, S. P., Stover, A. M., Riley, W. T., Cella, D., et al. (2011). Item banks for measuring emotional distress from the Patient-Reported Outcomes Measurement Information System (PROMIS(R)): depression, anxiety, and anger. <i>Assessment</i> , 18(3), 263-283, doi:10.1177/10731911111411667. |
| PROMIS-Short Form 8 | Patient-Reported Outcomes Measurement Information System - Depression Short Form 8 Items |                                                                                                                                                                                                                                                                                                                                  |
| PSS-SR              | Posttraumatic Stress Disorder Symptom Scale                                              | Falsetti, S. A., Resnick, H. S., Resick, P. A., & Kilpatrick, D. (1993). The Modified PTSD Symptom Scale: A brief self-report measure of posttraumatic stress disorder. <i>The Behavioral Therapist</i> , 16, 161-162.                                                                                                           |
| PSWQ                | Penn State Worry Questionnaire                                                           | Meyer, T. J., Miller, M. L., Metzger, R. L., & Borkovec, T. D. (1990). Development and validation of the Penn State Worry Questionnaire. <i>Behav Res Ther</i> , 28(6), 487-495.                                                                                                                                                 |
| SAQ-A30             | Social Anxiety Questionnaire                                                             | Caballo, V. E., Salazar, I. C., Iruiria, M. J., Arias, B., Hofmann, S. G., & Team, C.-A. R. (2012). The multidimensional nature and multicultural validity of a new measure of social anxiety: the Social Anxiety Questionnaire for Adults. <i>Behav Ther</i> , 43(2), 313-328, doi:10.1016/j.beth.2011.07.001.                  |
| SHAI                | Health Anxiety Inventory                                                                 | Salkovskis, P. M., Rimes, K. A., Warwick, H. M., & Clark, D. M. (2002). The Health Anxiety Inventory: development and validation of scales for the measurement of health anxiety and hypochondriasis. <i>Psychol Med</i> , 32(5), 843-853.                                                                                       |
| SIAS+SPS            | Social Interaction Scale + Social Phobia Scale                                           | Mattick, R. P., & Clarke, J. C. (1998). Development and validation of measures of social phobia scrutiny fear and social interaction anxiety. <i>Behav Res Ther</i> , 36(4), 455-470.                                                                                                                                            |
| SPAI                | Social Phobia and Anxiety Inventory                                                      | Turner, S. M., Beidel, D. C., Dancu, C. V., & Sganley, M. A. (1989). An empirically derived inventory to measure social fears and anxiety: The Social Phobia and Anxiety Inventory. <i>Psychological Assessment: A Journal of Consulting and Clinical Psychology</i> , 1(1), 35-40.                                              |

|                             |                                                                                 |                                                                                                                                                                                                                                                                                                                                               |
|-----------------------------|---------------------------------------------------------------------------------|-----------------------------------------------------------------------------------------------------------------------------------------------------------------------------------------------------------------------------------------------------------------------------------------------------------------------------------------------|
| SPAI-18                     | Social Phobia and Anxiety Inventory short version                               | de Vente, W., Majdandzic, M., Voncken, M. J., Beidel, D. C., & Bogels, S. M. (2014). The SPAI-18, a brief version of the social phobia and anxiety inventory: reliability and validity in clinically referred and non-referred samples. <i>J Anxiety Disord</i> , 28(2), 140-147, doi:10.1016/j.janxdis.2013.05.003.                          |
| SPDQ                        | Social Phobia Diagnostic Questionnaire                                          | Newman, M. G., Kachin, K. E., Zuellig, A. R., Constantino, M. J., & Cashman-McGrath, L. (2003). The social phobia diagnostic questionnaire: preliminary validation of a new self-report diagnostic measure of social phobia. <i>Psychol Med</i> , 33(4), 623-635.                                                                             |
| SPIN                        | Social Phobia Inventory                                                         | Connor, K. M., Davidson, J. R., Churchill, L. E., Sherwood, A., Foa, E., & Weisler, R. H. (2000). Psychometric properties of the Social Phobia Inventory (SPIN). New self-rating scale. <i>Br J Psychiatry</i> , 176, 379-386.                                                                                                                |
| STAI                        | State-Trait Anxiety Inventory                                                   | Spielberger, C. D., Gorsuch, R. L., Lushene, R., Vagg, P. R., & Jacobs, G. A. (1983). <i>Manual for the State-Trait Anxiety Inventory</i> . Palo Alto, CA: Consulting Psychologists Press.                                                                                                                                                    |
| Y-BOCS                      | Yale-Brown Obsessive Compulsive Scale                                           | Goodman, W. K., Price, L. H., Rasmussen, S. A., Mazure, C., Fleischmann, R. L., Hill, C. L., et al. (1989). The Yale-Brown Obsessive Compulsive Scale. I. Development, use, and reliability. <i>Arch Gen Psychiatry</i> , 46(11), 1006-1011.                                                                                                  |
| ZungSAS                     | Zung Self-rating Anxiety Scale                                                  | Zung, W. W. (1971). A rating instrument for anxiety disorders. <i>Psychosomatics</i> , 12(6), 371-379, doi:10.1016/S0033-3182(71)71479-0.                                                                                                                                                                                                     |
| <i>Functioning (n = 19)</i> |                                                                                 |                                                                                                                                                                                                                                                                                                                                               |
| CORE-OM                     | The CORE Outcome Measure                                                        | Barkham, M., Margison, F., Leach, C., Lucock, M., Mellor-Clark, J., Evans, C., et al. (2001). Service profiling and outcomes benchmarking using the CORE-OM: toward practice-based evidence in the psychological therapies. <i>Clinical Outcomes in Routine Evaluation-Outcome Measures</i> . <i>J Consult Clin Psychol</i> , 69(2), 184-196. |
| CPFQ                        | Massachusetts General Hospital Cognitive and Physical Functioning Questionnaire | Fava, M., Iosifescu, D. V., Pedrelli, P., & Baer, L. (2009). Reliability and validity of the Massachusetts general hospital cognitive and physical functioning questionnaire. <i>Psychother Psychosom</i> , 78(2), 91-97, doi:10.1159/000201934.                                                                                              |
| FAQ                         | Functional Activities Questionnaire                                             | Pfeffer, R. I., Kurosaki, T. T., Harrah, C. H., Jr., Chance, J. M., & Filos, S. (1982). Measurement of functional activities in older adults in the community. <i>J Gerontol</i> , 37(3), 323-329.                                                                                                                                            |
| FIM                         | Functional Independence Measure                                                 | Granger, C. V., Hamilton, B. B., Linacre, J. M., Heinemann, A. W., & Wright, B. D. (1993). Performance profiles of the functional independence measure. <i>Am J Phys Med Rehabil</i> , 72(2), 84-89.                                                                                                                                          |
| FSQ                         | Functional Status Questionnaire                                                 | Jette, A. M., Davies, A. R., Cleary, P. D., Calkins, D. R., Rubenstein, L. V., Fink, A., et al. (1986). The Functional Status Questionnaire: reliability and validity when used in primary care. <i>J Gen Intern Med</i> , 1(3), 143-149.                                                                                                     |
| GAF                         | Global Assessment of Functioning                                                | Hall, R. C. (1995). Global assessment of functioning. A modified scale. <i>Psychosomatics</i> , 36(3), 267-275, doi:10.1016/S0033-3182(95)71666-8.                                                                                                                                                                                            |
| GSDS-II                     | Groningen Social Disabilities Schedule                                          | Wiersma, D., DeJong, A., & Ormel, J. (1988). The Groningen Social Disabilities Schedule: development, relationship with I.C.I.D.H., and psychometric properties. <i>Int J Rehabil Res</i> , 11(3), 213-224.                                                                                                                                   |
| Katz ADL                    | Katz Index of Independence in Activities of Daily Living                        | Shelkey, M., & Wallace, M. (1999). Katz Index of Independence in Activities of Daily Living. <i>J Gerontol Nurs</i> , 25(3), 8-9.                                                                                                                                                                                                             |
| PROMIS                      | Physical Functioning                                                            | Rose, M., Bjorner, J. B., Becker, J., Fries, J. F., & Ware, J. E. (2008). Evaluation of a preliminary physical function item bank supported the expected advantages of the Patient-Reported Outcomes Measurement Information System (PROMIS). <i>J Clin Epidemiol</i> , 61(1), 17-33, doi:10.1016/j.jclinepi.2006.06.025.                     |
| PROMIS                      | Ability to Participate in Social Roles and Activities                           | Heinemann, A. W., Kisala, P. A., Hahn, E. A., & Tulsy, D. S. (2015). Development and psychometric characteristics of the SCI-QOL Ability to Participate and Satisfaction with Social Roles and Activities item banks and short forms. <i>J Spinal Cord Med</i> , 38(3), 397-408, doi:10.1179/2045772315Y.0000000028.                          |
| PROMIS                      | Satisfaction with Social Roles and Activities                                   |                                                                                                                                                                                                                                                                                                                                               |
| PSMS                        | Physical Self-Maintenance Scale                                                 | Lawton, M. P., & Brody, E. M. (1969). Assessment of older people: self-maintaining and instrumental activities of daily living. <i>Gerontologist</i> , 9(3), 179-186.                                                                                                                                                                         |

|        |                                       |                                                                                                                                                                                                                                                                                            |
|--------|---------------------------------------|--------------------------------------------------------------------------------------------------------------------------------------------------------------------------------------------------------------------------------------------------------------------------------------------|
| SAS-SR | Social Adjustment Scale - Self Report | Weissman, M. M., Prusoff, B. A., Thompson, W. D., Harding, P. S., & Myers, J. K. (1978). Social adjustment by self-report in a community sample and in psychiatric outpatients. <i>J Nerv Ment Dis</i> , 166(5), 317-326.                                                                  |
| SBS    | Social Behaviour Schedule             | Wykes, T., & Sturt, E. (1986). The measurement of social behaviour in psychiatric patients: an assessment of the reliability and validity of the SBS schedule. <i>Br J Psychiatry</i> , 148, 1-11.                                                                                         |
| SF-36  | Short Form Survey                     | Ware, J. E., Jr., & Sherbourne, C. D. (1992). The MOS 36-item short-form health survey (SF-36). I. Conceptual framework and item selection. <i>Med Care</i> , 30(6), 473-483.                                                                                                              |
| SFQ    | Social Functioning Questionnaire      | Tyrera, P., Mersona, S., Harrison-Reada, P., Lynch, S., Birketta, P., & Onyetta, S. (1990). A pilot study of the effects of early intervention on clinical symptoms and social functioning in psychiatric emergencies. <i>Irish Journal of Psychological Medicine</i> , 7(02), 132-134.    |
| SFS2   | Social Functioning Scale              | Birchwood, M., Smith, J., Cochrane, R., Wetton, S., & Copestake, S. (1990). The Social Functioning Scale. The development and validation of a new scale of social adjustment for use in family intervention programmes with schizophrenic patients. <i>Br J Psychiatry</i> , 157, 853-859. |
| SRP    | Social Role Performance Schedule      | Sturt, E., & Wykes, T. (1987). Assessment schedules for chronic psychiatric patients. <i>Psychol Med</i> , 17(2), 485-493.                                                                                                                                                                 |
| WRFQ   | Work Role Functioning Questionnaire   | Amick, B. C., 3rd, Lerner, D., Rogers, W. H., Rooney, T., & Katz, J. N. (2000). A review of health-related work outcome measures and their uses, and recommended measures. <i>Spine (Phila Pa 1976)</i> , 25(24), 3152-3160.                                                               |

| Appendix 2: Working group teleconference topics and survey response rates                                                                                                                                                                                                                                                                         |                   |                                                                      |                                 |
|---------------------------------------------------------------------------------------------------------------------------------------------------------------------------------------------------------------------------------------------------------------------------------------------------------------------------------------------------|-------------------|----------------------------------------------------------------------|---------------------------------|
| Topic                                                                                                                                                                                                                                                                                                                                             | Date              | Title                                                                | Online survey Response Rate [%] |
| "Kick-Off"                                                                                                                                                                                                                                                                                                                                        | 17 June 2014      | Launch of the Depression and Anxiety Working Group and setting Scope | 77                              |
| Teleconference 1                                                                                                                                                                                                                                                                                                                                  | 1 July 2014       | Selecting Outcome Domains                                            | 70                              |
| Teleconference 2                                                                                                                                                                                                                                                                                                                                  | 29 July 2014      | Selecting Outcome Definitions                                        | 85                              |
| Teleconference 3                                                                                                                                                                                                                                                                                                                                  | 26 August 2014    | Selecting Baseline Characteristics                                   | 90                              |
| Teleconference 4                                                                                                                                                                                                                                                                                                                                  | 16 September 2014 | Selecting Baseline Characteristics Measures                          | 85                              |
| Teleconference 5                                                                                                                                                                                                                                                                                                                                  | 14 October 2014   | Finalize the Standard Set / Prepare for launch and publication       | 100                             |
| Teleconference 6                                                                                                                                                                                                                                                                                                                                  | 4 November 2014   | Transition to Implementation                                         | -                               |
| Teleconference 7                                                                                                                                                                                                                                                                                                                                  | 3 March 2015      | Revision of the Standard Set*                                        | 85                              |
| *During the review of the compiled Standard Set, the Working Group expressed concerns about the total length of the recommended Standard Set and decided to break the assessment into two modules: one for treatment monitoring and one focusing on annual outcome assessment. This was subsequently voted on and agreed to by the Working Group. |                   |                                                                      |                                 |

| Appendix 3: Voting percentages of modified Delphi method by working group members on scope. |                                               |                        |                             |                         |                                                                                                                                                                     |
|---------------------------------------------------------------------------------------------|-----------------------------------------------|------------------------|-----------------------------|-------------------------|---------------------------------------------------------------------------------------------------------------------------------------------------------------------|
| Domain                                                                                      | Subdomain                                     | Vote for inclusion [%] | Conclusion after first vote | Inclusion [Y=Yes; N=No] | Comments                                                                                                                                                            |
| Patient population                                                                          | Depressive Adaptive / Adjustment Disorder     | 60                     | Debate further              | Y                       | Group decided to include it after discussion as outcomes are the same and as there are no clear differences between symptoms and functions.                         |
|                                                                                             | Major depressive disorder                     | 100                    | Include                     | Y                       |                                                                                                                                                                     |
|                                                                                             | Depressive disorder – Not otherwise specified | 81                     |                             | Y                       |                                                                                                                                                                     |
|                                                                                             | Dysthymia                                     | 76                     |                             | Y                       |                                                                                                                                                                     |
|                                                                                             | General anxiety disorder                      | 100                    |                             | Y                       |                                                                                                                                                                     |
|                                                                                             | Phobic disorder                               | 100                    |                             | Y                       |                                                                                                                                                                     |
|                                                                                             | Panic disorder                                | 100                    |                             | Y                       |                                                                                                                                                                     |
|                                                                                             | Post-traumatic stress disorder                | 87                     |                             | Y                       |                                                                                                                                                                     |
|                                                                                             | Obsessive-compulsive disorder                 | 79                     |                             | Y                       |                                                                                                                                                                     |
|                                                                                             | Schizophrenic disorder                        | 7                      |                             | Exclude                 |                                                                                                                                                                     |
| Bipolar disorder                                                                            | 29                                            | N                      |                             |                         |                                                                                                                                                                     |
| Somatoform disorder                                                                         | 13                                            | N                      |                             |                         |                                                                                                                                                                     |
| Other main diagnoses                                                                        | 14                                            | N                      |                             |                         |                                                                                                                                                                     |
| Age restriction                                                                             | >18 years                                     | 47                     | Debate further              | >14 years               | Group decided to include patients above age of 14 as onset of depression may be before 18. Evidence shows good validity for common adult measures for adolescents*. |
|                                                                                             | >14 years                                     | 41                     |                             |                         |                                                                                                                                                                     |
|                                                                                             | No restriction at all                         | 12                     |                             |                         |                                                                                                                                                                     |

\*Allgaier AK, Pietsch K, Fruhe B, Sigl-Glockner J, Schulte-Korne G. Screening for depression in adolescents: validity of the patient health questionnaire in pediatric care. *Depression and anxiety*. 2012;29(10):906-913.



Appendix 4: Voting percentages of modified Delphi method by working group members on outcome domains.

| Domain*                                          | Outcome                                         | Votes** (revotes) for inclusion [%] | Conclusion after first vote | Final inclusion [Y=Yes; N=No] | Comments                                                                                                                                                       |
|--------------------------------------------------|-------------------------------------------------|-------------------------------------|-----------------------------|-------------------------------|----------------------------------------------------------------------------------------------------------------------------------------------------------------|
| Survival                                         |                                                 |                                     |                             | N                             | Group discussion revealed no relevance for Depression / Anxiety                                                                                                |
| Degree of health achieved or maintained          | Symptoms of depression / anxiety                | 100                                 | Include                     | Y                             |                                                                                                                                                                |
|                                                  | Social functioning                              | 100                                 | Include                     | Y                             |                                                                                                                                                                |
|                                                  | Occupational functioning / work status          | 100                                 | Include                     | Y                             |                                                                                                                                                                |
|                                                  | Physical functioning / status                   | 71                                  | Include                     | Y                             |                                                                                                                                                                |
| Time to recovery and return to normal activities | Time to symptom relief / sufficient functioning | 82                                  | Include                     | Y                             |                                                                                                                                                                |
| Disutility of the care or treatment process      | Medication side-effects                         | 65                                  | Debate further              | Y                             | Prompted by strong preferences by patients in the group as these are felt very important for treatment adherence.                                              |
| Sustainability of health / recovery              | Overall success of treatment                    | 79                                  | Include                     | Y                             |                                                                                                                                                                |
|                                                  | Reason for failure of treatment                 | 72 (94)                             | Include                     | N                             | Combined with "Overall success of treatment" after first round, excluded in the last round when item burden was reduced due to concern of reliable collection. |
|                                                  | Recurrence of disease                           | 75                                  | Include                     | Y                             |                                                                                                                                                                |
|                                                  | Type of on-going treatment                      | 72                                  | Include                     | Y                             | Felt essential for segmenting patients for analysis                                                                                                            |
|                                                  | # of emergency visits                           | 51                                  | Debate further              | N                             | Excluded after group discussion as it is only relevant in small portion of patients with anxiety disorder.                                                     |
|                                                  | # of working days missed                        | 75                                  | Include                     | Y                             |                                                                                                                                                                |
|                                                  | # of days suffering from disease                | 75 (88)                             | Include                     | N                             | Excluded in the last round after group discussion as felt to be too difficult to measure retrospectively                                                       |
| Long-term consequences of therapy                |                                                 |                                     |                             | N                             | Group discussion revealed no relevance for Depression / Anxiety                                                                                                |

\*based on Michael Porters outcome hierarchy: Porter ME. What is value in health care? *N Engl J Med.* 2010;363(26):2477-2481

\*\*Domains were included if % of essential votes + ½ % of "nice to have" votes were above 66%, and debated further if it was between 50% and 66%.

| Appendix 5: Voting percentages of modified Delphi method by working group members on baseline characteristics. |                                                                       |                                   |                             |                                                                                                                               |                                                                                                                    |
|----------------------------------------------------------------------------------------------------------------|-----------------------------------------------------------------------|-----------------------------------|-----------------------------|-------------------------------------------------------------------------------------------------------------------------------|--------------------------------------------------------------------------------------------------------------------|
| Domain                                                                                                         | Baseline characteristic                                               | Votes (revotes) for inclusion [%] | Conclusion after first vote | Final Inclusion [Y=Yes; N=No]                                                                                                 | Comments                                                                                                           |
| Demographics                                                                                                   | Age                                                                   | 100                               | Include                     | Y                                                                                                                             |                                                                                                                    |
|                                                                                                                | Gender                                                                | 100                               | Include                     | Y                                                                                                                             |                                                                                                                    |
|                                                                                                                | Race/Ethnicity                                                        | 72                                | Include                     | N                                                                                                                             | No measure was found to reliably collect this internationally and the item was then excluded in subsequent rounds. |
|                                                                                                                | Socioeconomics (income/ education)                                    | 100                               | Include                     | Y                                                                                                                             |                                                                                                                    |
|                                                                                                                | Housing situation (e.g. assisted living, with spouse, parents, alone) | 83                                | Include                     | Y                                                                                                                             |                                                                                                                    |
|                                                                                                                | Community-based measures                                              | 31                                | Exclude                     | N                                                                                                                             |                                                                                                                    |
|                                                                                                                | Urbanicity (e.g. measured by postal code)                             | 47                                | Exclude                     | N                                                                                                                             |                                                                                                                    |
|                                                                                                                | Religion/Belief                                                       | 11                                | Exclude                     | N                                                                                                                             |                                                                                                                    |
|                                                                                                                | Sexual orientation                                                    | 0                                 | Exclude                     | N                                                                                                                             |                                                                                                                    |
|                                                                                                                | Marital status                                                        | 53                                | Debate Further              | N                                                                                                                             | Combined with "housing situation" to "living situation"                                                            |
|                                                                                                                | Retirement status                                                     | 33                                | Exclude                     | N                                                                                                                             |                                                                                                                    |
|                                                                                                                | Sick pay status                                                       | 33                                | Exclude                     | N                                                                                                                             |                                                                                                                    |
|                                                                                                                | Health insurance that covers treatment                                | 39                                | Exclude                     | N                                                                                                                             |                                                                                                                    |
|                                                                                                                | Baseline functional status                                            | Work status                       | 100                         | Include                                                                                                                       | Y                                                                                                                  |
| Occupational functioning                                                                                       |                                                                       | 89                                | Include                     | Y                                                                                                                             |                                                                                                                    |
| Social functioning                                                                                             |                                                                       | 89                                | Include                     | Y                                                                                                                             |                                                                                                                    |
| Physical functioning                                                                                           |                                                                       | 89                                | Include                     | Y                                                                                                                             |                                                                                                                    |
| Social support/network                                                                                         |                                                                       | 72                                | Include                     | Y                                                                                                                             |                                                                                                                    |
| Duration of sick leave before treatment                                                                        |                                                                       | 28                                | Exclude                     | N                                                                                                                             |                                                                                                                    |
| (inherent) disability                                                                                          |                                                                       | 24                                | Exclude                     | N                                                                                                                             |                                                                                                                    |
| Morbidity state                                                                                                |                                                                       | 12                                | Exclude                     | N                                                                                                                             |                                                                                                                    |
| Physical activity / sports                                                                                     |                                                                       | 17                                | Exclude                     | N                                                                                                                             |                                                                                                                    |
| Maximum walking distance                                                                                       | 6                                                                     | Exclude                           | N                           |                                                                                                                               |                                                                                                                    |
| Baseline clinical status                                                                                       | Symptoms of depression                                                | 95                                | Include                     | Y                                                                                                                             |                                                                                                                    |
|                                                                                                                | Symptoms of anxiety                                                   | 95                                | Include                     | Y                                                                                                                             |                                                                                                                    |
|                                                                                                                | BMI                                                                   | 68 (94)                           | Include                     | N                                                                                                                             | Excluded in the last round when item burden was reduced due to concern of reliable collection.                     |
|                                                                                                                | Comorbidities                                                         | 100                               | Include                     | Y                                                                                                                             |                                                                                                                    |
|                                                                                                                | Chronic disease                                                       | 63                                | Debate Further              | N                                                                                                                             | Excluded after group discussion since operationalization was felt to be too difficult.                             |
|                                                                                                                | Smoking                                                               | 44                                | Exclude                     | N                                                                                                                             |                                                                                                                    |
|                                                                                                                | Patients' motivation and expectancy                                   | 78                                | Include                     | Y                                                                                                                             |                                                                                                                    |
|                                                                                                                | Major life events                                                     | 53                                | Debate Further              | N                                                                                                                             | Excluded after group discussion since operationalization was felt to be too difficult.                             |
|                                                                                                                | Personality factors                                                   | 35                                | Exclude                     | N                                                                                                                             |                                                                                                                    |
| Level of pain                                                                                                  | 50                                                                    | Debate further                    | N                           | Excluded after group discussion since it is only relevant in certain comorbidities (such as chronic pain disorder or cancer). |                                                                                                                    |

|                 |                                                    |      |                |   |                                                                                                                                       |
|-----------------|----------------------------------------------------|------|----------------|---|---------------------------------------------------------------------------------------------------------------------------------------|
|                 | Positive family history                            | 56   | Debate Further | N | Excluded after group discussion as it is not an indicator for treatment success but for individual risk to develop a mental disorder. |
|                 | Patients' belief about returning to work           | 0    | Exclude        | N |                                                                                                                                       |
|                 | Prior episodes                                     | (82) |                | Y | Added in next round after Working group discussion                                                                                    |
| Prior Treatment | Prior psychotherapy                                | 95   | Include        | Y |                                                                                                                                       |
|                 | Duration of symptoms                               | 95   | Include        | Y |                                                                                                                                       |
|                 | Medication (prior and current)                     | 100  | Include        | Y |                                                                                                                                       |
|                 | Previous treatment in other psychiatric conditions | 47   | Exclude        | N |                                                                                                                                       |

| Appendix 6: Voting percentages of modified Delphi method by working group members on outcome measures. |                    |                  |                   |                     |            |                   |                            |                     |                                        |                                                           |                         |          |
|--------------------------------------------------------------------------------------------------------|--------------------|------------------|-------------------|---------------------|------------|-------------------|----------------------------|---------------------|----------------------------------------|-----------------------------------------------------------|-------------------------|----------|
| Outcome                                                                                                | Instrument         | Specifications   |                   |                     |            |                   |                            |                     | Conclusion after working group meeting | Vote for inclusion [%]                                    | Inclusion [Y=Yes; N=No] | Comments |
|                                                                                                        |                    | Year published   | Symptom coverage* | Scale               | # of items | # of translations | License fee [Y=Yes ; N=No] | # of Pubmed hits*** |                                        |                                                           |                         |          |
| <b>Depressive Symptoms</b>                                                                             | CES-D              | 1977             | complete          | frequency           | 20         | >40               | N                          | 2426                | Exclude                                | 6 (pooled response option "other measure for depression") | N                       |          |
|                                                                                                        | WHO-5              | 1998             | incomplete        | frequency           | 5          | 31                | N                          | 187                 | Exclude                                |                                                           | N                       |          |
|                                                                                                        | BDI-II             | 1996             | complete          | Y/N                 | 21         | 17                | Y                          | 804                 | Exclude                                |                                                           | N                       |          |
|                                                                                                        | HADS               | 1983             | Incomplete        | intensity           | 7          | 111               | Y                          | 2426                | Exclude                                |                                                           | N                       |          |
|                                                                                                        | QIDS-SR            | 2003             | Complete          | frequency/intensity | 16         | 31                | N                          | 86                  | Exclude                                |                                                           | N                       |          |
|                                                                                                        | MADRS-S            | 1994             | complete          | intensity           | 9          | 42                | N                          | 31                  | Exclude                                |                                                           | N                       |          |
|                                                                                                        | SDS                | 1965             | complete          | frequency           | 20         | >10               | N                          | 569                 | Exclude                                | N                                                         |                         |          |
|                                                                                                        | <b>PHQ-9**</b>     | <b>1999</b>      | <b>complete</b>   | <b>frequency</b>    | <b>10</b>  | <b>79</b>         | <b>N</b>                   | <b>875</b>          | <b>Include in survey</b>               | <b>75</b>                                                 | <b>Y</b>                |          |
|                                                                                                        | PROMIS Depression* | 2009             | incomplete        | intensity           | 8          | 12                | N                          | 55                  | Include in survey                      | 19                                                        | N                       |          |
| <b>General anxiety disorder</b>                                                                        | STAI               | 1983             | complete          | frequency/intensity | 40         | 48                | Y                          | 1783                | Exclude                                | 0 (pooled response option "other measure for anxiety")    | N                       |          |
|                                                                                                        | BAI                | 1993             | complete          | intensity           | 21         | 13                | Y                          | 353                 | Exclude                                |                                                           | N                       |          |
|                                                                                                        | HADS               | 1983             | complete          | intensity           | 7          | 111               | Y                          | 2428                | Exclude                                |                                                           | N                       |          |
|                                                                                                        | ZungSAS            | 1971             | complete          | frequency           | 20         | >10               | N                          | 329                 | Exclude                                |                                                           | N                       |          |
|                                                                                                        |                    | PROMIS Anxiety** | 2011              | complete            | intensity  | 8                 | 6                          | N                   | 42                                     | Include in survey                                         | 25                      | N        |
|                                                                                                        | <b>GAD-7**</b>     | <b>2006</b>      | <b>incomplete</b> | <b>frequency</b>    | <b>7</b>   | <b>71</b>         | <b>N</b>                   | <b>126</b>          | <b>Include in survey</b>               | <b>75</b>                                                 | <b>Y</b>                |          |
| Social Phobia                                                                                          | SPIN               | 2000             | complete          | intensity           | 17         |                   | N                          | 48                  | Include in survey                      | 92                                                        | Y                       |          |
|                                                                                                        | SAQ-A30            | 2012             | complete          | intensity           | 30         | 8                 | N                          | 4                   | Exclude                                |                                                           | N                       |          |
|                                                                                                        | SIAS+SPS           | 1998             | complete          | intensity           | 20+20      | 4                 | N                          | 30                  | Exclude                                |                                                           | N                       |          |
| Agoraphobia                                                                                            | MI                 | 1995             | complete          | frequency           | 27         | 4                 | N                          | 8                   | Include in survey                      | 92                                                        | Y                       |          |
|                                                                                                        | PAS                | 1995             | complete          | frequency/intensity | 13         | >10               | Y                          | 32                  | Exclude                                | 8                                                         | N                       |          |
| Post-traumatic symptom disorder                                                                        | IES-R              | 1997             | complete          | intensity           | 22         | >10               | N                          | 231                 | Include in survey                      | 75                                                        | Y                       |          |

|                                                     |                              |             |                 |                     |           |           |          |            |                                                              |           |          |                                                        |
|-----------------------------------------------------|------------------------------|-------------|-----------------|---------------------|-----------|-----------|----------|------------|--------------------------------------------------------------|-----------|----------|--------------------------------------------------------|
|                                                     | PCL                          | 1993        | complete        | intensity           | 17        | >10       | N        | 254        | Exclude                                                      | 25        | N        |                                                        |
| Panic Disorder                                      | PDSS-SR                      | 1997        | complete        | frequency/intensity | 7         | 9         | N        | 62         | Include in survey                                            | 92        | Y        |                                                        |
|                                                     | PAI                          | 1987        | complete        | intensity           | 45        | 1         | N        | 8          | Exclude                                                      | 8         | N        |                                                        |
| Obsessive-compulsive disorder                       | OCI                          | 1998        | complete        | intensity           | 42        | >10       | N        | 45         | Include in survey                                            | 92        | Y        |                                                        |
|                                                     | PI-R                         | 1996        | complete        | intensity           | 39        | <10       | N        | 69         | Exclude                                                      | 8         | N        |                                                        |
| <b>Functioning (physical, occupational, social)</b> | WHODAS 2.0 36 Items          | 2010        | complete        | intensity           | 36        | 13        | N        | 140        | Include in survey                                            | 14        | N        |                                                        |
|                                                     | <b>WHODAS 2.0 12 Items</b>   | <b>2010</b> | <b>complete</b> | <b>intensity</b>    | <b>12</b> | <b>13</b> | <b>N</b> | <b>140</b> | <b>Include in survey</b>                                     | <b>69</b> | <b>Y</b> |                                                        |
|                                                     | WSAS                         | 2002        | complete        | intensity           | 5         | n/a       | N        | 88         | Include in survey                                            | 14        | N        |                                                        |
|                                                     | SF36                         | 1989        | complete        | frequency/intensity | 36        | >100      | Y        | >10000     | Exclude                                                      |           |          |                                                        |
|                                                     | CORE-OM                      | 2001        | incomplete      | frequency           | 34/10     | 10        | N        | 59         | Exclude                                                      |           |          |                                                        |
|                                                     | HAQ                          | 1982        | Incomplete      | intensity           | 21        | >20       | N        | 1456       | Exclude                                                      |           |          |                                                        |
|                                                     | SAS-SR                       | 1976        | Incomplete      | intensity           | 54        | 20        | Y        | 135        | Exclude                                                      |           |          |                                                        |
|                                                     | SASS                         | 1997        | complete        | intensity           | 21        | >10       | N        | 35         | Exclude                                                      |           |          |                                                        |
|                                                     | PROMIS                       | 2006 / 2010 | complete        | intensity           | 8+8       | 13/5      | N        | 75/4       | Include in survey                                            | 56        | N        |                                                        |
| <b>Time to recovery</b>                             | <b>Reliable Change Index</b> |             |                 |                     |           |           |          |            | <b>Include in combination with instrument cut-off points</b> | <b>75</b> | <b>Y</b> | <b>See Table 1 and Appendix 7 for more information</b> |

| <b>Outcome</b>          | <b>Items</b>                | <b>Conclusion after working group meeting</b> | <b>Vote for inclusion [%]</b> | <b>Inclusion [Y=Yes; N=No]</b> | <b>Comments</b>                                                                                   |
|-------------------------|-----------------------------|-----------------------------------------------|-------------------------------|--------------------------------|---------------------------------------------------------------------------------------------------|
| Medication side-effects | Weight gain                 |                                               | 100                           | Y                              |                                                                                                   |
|                         | Sexual dysfunction          |                                               | 88                            | Y                              |                                                                                                   |
|                         | Sleep disturbances          |                                               | 88                            | Y                              |                                                                                                   |
|                         | Dry mouth                   |                                               | 50                            | Y                              | Included after group discussion as it is a typical side-effect in classical antidepressant drugs. |
|                         | Drowsiness / sedation       |                                               | 94                            | Y                              |                                                                                                   |
|                         | Cardiovascular side-effects |                                               | 60                            | Y                              | Included after group discussion as it is a                                                        |

|                                                                                                                                                                                                                                         |                                                             |  |            |   |                                                                                                                   |
|-----------------------------------------------------------------------------------------------------------------------------------------------------------------------------------------------------------------------------------------|-------------------------------------------------------------|--|------------|---|-------------------------------------------------------------------------------------------------------------------|
|                                                                                                                                                                                                                                         |                                                             |  |            |   | typical side-effect in psychopharmacological drugs                                                                |
|                                                                                                                                                                                                                                         | Gastrointestinal side-effects                               |  | <b>94</b>  | Y |                                                                                                                   |
| Overall success / reasons for failure                                                                                                                                                                                                   | Access to treatment                                         |  | <b>100</b> | Y | Group finally decided to integrate items into an "overall success" question to reduce item burden (82% agreement) |
|                                                                                                                                                                                                                                         | Costs of treatment                                          |  | <b>100</b> |   |                                                                                                                   |
|                                                                                                                                                                                                                                         | Relocation                                                  |  | <b>92</b>  |   |                                                                                                                   |
|                                                                                                                                                                                                                                         | Worsening of mood symptoms                                  |  | <b>88</b>  |   |                                                                                                                   |
|                                                                                                                                                                                                                                         | Interpersonal therapeutic alliance                          |  | <b>100</b> |   |                                                                                                                   |
|                                                                                                                                                                                                                                         | Poor, unproductive, or hostile therapy sessions             |  | <b>69</b>  |   |                                                                                                                   |
|                                                                                                                                                                                                                                         | Therapy adherence                                           |  | <b>88</b>  |   |                                                                                                                   |
|                                                                                                                                                                                                                                         | Medication side-effects                                     |  | <b>100</b> |   |                                                                                                                   |
|                                                                                                                                                                                                                                         | Treatment ineffectiveness / lack of improvement             |  | <b>94</b>  |   |                                                                                                                   |
| Recurrence of disease                                                                                                                                                                                                                   | Physician reported date of clinical diagnosis of recurrence |  | <b>83</b>  |   | Was first suggested as clinician reported. On revision changed to Patient reported outcome (82% agreement)        |
| <p>Full questionnaires and items are shown in the reference guide (<a href="http://www.ichom.org">www.ichom.org</a>)<br/> *ICD/DSM<br/> **representative samples available<br/> ***as an indicator for prominence and dissemination</p> |                                                             |  |            |   |                                                                                                                   |

| Appendix 7: Voting percentages of modified Delphi method by working group members on baseline characteristic measures. |                                                                |                |            |                   |                           |                     |                                        |                        |                         |                                                                                                                                 |
|------------------------------------------------------------------------------------------------------------------------|----------------------------------------------------------------|----------------|------------|-------------------|---------------------------|---------------------|----------------------------------------|------------------------|-------------------------|---------------------------------------------------------------------------------------------------------------------------------|
| Baseline characteristic                                                                                                | Instrument / Item                                              | Specifications |            |                   |                           |                     | Conclusion after working group meeting | Vote for inclusion [%] | Inclusion [Y=Yes; N=No] | Comments                                                                                                                        |
|                                                                                                                        |                                                                | Year published | # of items | # of translations | License fee [Y=Yes; N=No] | # of Pubmed hits*** |                                        |                        |                         |                                                                                                                                 |
| Age                                                                                                                    | Date of birth                                                  |                | 1          |                   |                           |                     | Include                                | <b>94</b>              | Y                       |                                                                                                                                 |
| Gender                                                                                                                 | Sex at birth                                                   |                | 1          |                   |                           |                     | Include                                | <b>94</b>              | Y                       |                                                                                                                                 |
| Socioeconomics (Education)                                                                                             | The level of schooling is defined in each country as per ISCED |                | 1          |                   |                           |                     | Include                                | <b>100</b>             | Y                       |                                                                                                                                 |
| Living Status                                                                                                          | living arrangements                                            |                | 1          |                   |                           |                     | Include                                | <b>89</b>              | Y                       |                                                                                                                                 |
| Work status                                                                                                            | Current work status                                            |                | 1          |                   |                           |                     | Include                                | <b>94</b>              | Y                       |                                                                                                                                 |
| Social support/network                                                                                                 | Medical Outcomes Study Social Support Survey (MOS-SSS)         | 2014           | 4          | n/a               | N                         | 1                   | Include                                | <b>83</b>              | Y                       |                                                                                                                                 |
| Comorbidities                                                                                                          | Self-Report Charlson Comorbidity Index & mental comorbidities  | 2003           | 1          | n/a               | N                         | 39                  | Include                                | <b>88</b>              | Y                       |                                                                                                                                 |
| Patients' motivation and expectancy                                                                                    | Adapted credibility/expectancy questionnaire                   | 2000           | 1          | n/a               | N                         | 8                   | Include                                | <b>83</b>              | Y                       |                                                                                                                                 |
| Prior episodes                                                                                                         | Similar episodes before                                        |                | 1          |                   |                           |                     | Include                                | <b>82</b>              | Y                       | Only in patients with depression                                                                                                |
| Prior psychotherapy                                                                                                    | Psychotherapy during last year                                 |                | 1          |                   |                           |                     | Include                                | <b>94</b>              | Y                       |                                                                                                                                 |
| Duration of symptoms                                                                                                   | # of month symptoms have been experienced                      |                | 1          |                   |                           |                     | Debate further                         | <b>53</b>              | Y                       | Included after group discussion as duration of an episode/disorder impacts outcome. Item revised in last round (88% agreement). |
| Medication (prior and current)                                                                                         | Medication intake during last year                             |                | 1          |                   |                           |                     | Include                                | <b>100</b>             | Y                       |                                                                                                                                 |

Appendix 8: Optional Measures for specific anxiety disorders as proposed by IAPT

| Main Diagnosis                 | Measure                                                  |                                | # of Items | # of translations | Scale                   | Reliable Change Index <sup>6</sup> |                                     |                                                  | Cut-Off-Score <sup>10</sup>               | Range of Score (lowest to highest) | Year published |
|--------------------------------|----------------------------------------------------------|--------------------------------|------------|-------------------|-------------------------|------------------------------------|-------------------------------------|--------------------------------------------------|-------------------------------------------|------------------------------------|----------------|
|                                |                                                          |                                |            |                   |                         | Initial M (SD) <sup>7</sup>        | Internal consistency <sup>8,7</sup> | Reliable change of Instrument score <sup>9</sup> |                                           |                                    |                |
| Social Anxiety Disorder        | Social Phobia Inventory <sup>1</sup>                     |                                | 17         | 8                 | Intensity               | 41.1 (10.2)                        | 0.87 to 0.94                        | >9                                               | >18                                       | 0 to 68                            | 2000           |
| Agoraphobia                    | Agoraphobia Mobility Inventory <sup>2</sup>              | Avoidance Alone Subscale       | 27         | >10               | Frequency               | 3.30 (0.99)                        | 0.94                                | ≥0.7                                             | Above an item average of 2.3              | 1 to 5                             | 1985           |
|                                |                                                          | Avoidance Accompanied Subscale |            |                   |                         | 2.41 (0.70)                        | 0.91                                | ≥0.6                                             | Not relevant for diagnosis of Agoraphobia | 1 to 5                             |                |
| Post-Traumatic-Stress Disorder | Impacts of Events Scale Revised <sup>3</sup>             |                                | 22         | >10               | Intensity               | 58.08 (15.18)                      | 0.96                                | >8                                               | >32                                       | 0 to 88                            | 1997           |
| Panic Disorder                 | Panic Disorder Severity Scale – Self-Report <sup>4</sup> |                                | 7          | 9                 | Frequency and Intensity | 9.0 (6.6)                          | 0.92                                | >5                                               | >7                                        | 0 to 28                            | 2002           |
| Obsessive Compulsive Disorder  | Obsessive Compulsive Inventory <sup>5</sup>              |                                | 42         | >10               | Intensity               | 66.33 (31.9)                       | 0.92                                | >25                                              | >39                                       | 0 to 168                           | 1998           |

M=mean, SD=standard deviation, sqrt = square root  
 1 Connor KM, Davidson JR, Churchill LE, Sherwood A, Foa E, Weisler RH. Psychometric properties of the Social Phobia Inventory (SPIN). *New self-rating scale. The British journal of psychiatry: the journal of mental science.* 2000;176:379-386.  
 2 Chambless DL, Caputo GC, Jasin SE, Gracely EJ, Williams C. The Mobility Inventory for Agoraphobia. *Behaviour research and therapy.* 1985;23(1):35-44.  
 3 Creamer M, Bell R, Failla S. Psychometric properties of the Impact of Event Scale - Revised. *Behaviour research and therapy.* 2003;41(12):1489-1496.  
 4 Houck PR, Spiegel DA, Shear MK, Rucci P. Reliability of the self-report version of the panic disorder severity scale. *Depression and anxiety.* 2002;15(4):183-185.  
 5 Foa EB, Kozak MJ, Salkovskis PM, Coles ME, Amir N. The validation of a new obsessive-compulsive disorder scale: The Obsessive-Compulsive Inventory. *Psychological assessment.* 1998;10(3):206-214.  
 6 Jacobson NS, Truax P. Clinical significance: a statistical approach to defining meaningful change in psychotherapy research. *J Consult Clin Psychol.* 1991;59(1):12-19. To calculate the RCIs, reliability indices, sample means and score distributions were taken from the original validation studies. Patients' mental health status should be classified based on the RCIs and cut-off-scores (see Table 1). Cut-off scores determine whether patients are likely to meet diagnostic criteria for an existing mental health disorder. If the difference of instrument scores (T2-T1=Δ) is more negative than -RCI (negative Δ < -RCI), the patient is classified as "deteriorated". If Δ < ±RCI, irrespective of the cut-off, the patient is classified as "unchanged". If Δ > RCI and the cut-off is not achieved, the patient is classified as "improved". Finally, if Δ > RCI and the instrument cut-off is achieved, the patient is classified as "recovered".  
 7 Information taken from original validation studies (see 1-6)  
 8 Cronbach's α  
 9 Reliable Change index (RCI) calculated from Cronbach's α and initial SD (patients with positive diagnosis) from original validation studies (see 1-6); formula used for criterion level, based on change that would happen less than 5% of the time by unreliability of measurement alone:  $RCI=1.96*SD*sqrt(2)*sqrt(1-\alpha)$ ; results were rounded to integers if necessary for interpretation of the scale  
 10 Instrument Score that allows to make a diagnosis (confidence interval depends on measure)



Appendix 9: Overall number of Items and estimated time for completion if measures for specific anxiety disorders are added.

|                               | <b>Specific Anxiety Disorders</b> |                   |                    |                   |                                       |                   |                       |                   |                                      |                   |
|-------------------------------|-----------------------------------|-------------------|--------------------|-------------------|---------------------------------------|-------------------|-----------------------|-------------------|--------------------------------------|-------------------|
|                               | <b>Social Anxiety Disorder</b>    |                   | <b>Agoraphobia</b> |                   | <b>Post-Traumatic-Stress Disorder</b> |                   | <b>Panic Disorder</b> |                   | <b>Obsessive Compulsive Disorder</b> |                   |
|                               | <i># of Items</i>                 | <i>Time [min]</i> | <i># of Items</i>  | <i>Time [min]</i> | <i># of Items</i>                     | <i>Time [min]</i> | <i># of Items</i>     | <i>Time [min]</i> | <i># of Items</i>                    | <i>Time [min]</i> |
| BL (baseline set)             | 57                                | 15                | 67                 | 18                | 62                                    | 17                | 47                    | 13                | 82                                   | 22                |
| TM (treatment monitoring set) | 29                                | 8                 | 39                 | 11                | 34                                    | 10                | 19                    | 6                 | 54                                   | 15                |
| AO (annual outcome set)       | 54                                | 15                | 64                 | 17                | 59                                    | 16                | 44                    | 12                | 79                                   | 21                |

\*Information on time to complete surveys varies between 2.5 to 5 items per minute according to source. A mean of 3.75 was employed to calculate durations.
