# Supplementary material for: Standardization of health outcomes assessment for depression and anxiety: recommendations from the ICHOM Depression and Anxiety Working Group
Source: Springer Nature journal article supplement (doi:10.1007/s11136-017-1659-5), 2017-08-07
Supplement: MOESM3 [file 11136_2017_1659_MOESM3_ESM.pdf]

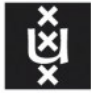

## UvA-DARE (Digital Academic Repository)

### Standardization of health outcomes assessment for depression and anxiety

*Recommendations from the ICHOM Depression and Anxiety Working Group*

Obbarius, A.; van Maasackers, L.; Baer, L.; Clark, D.M.; Crocker, A.G.; de Beurs, E.; Emmelkamp, P.M.G.; Furukawa, T.A.; Hedman-Lagerlöf, E.; Kangas, M.; Langford, L.; Lesage, A.; Mwesigire, D.M.; Nolte, S.; Patel, V.; Pilkonis, P.A.; Pincus, H.A.; Reis, R.A.; Rojas, G.; Sherbourne, C.; Smithson, D.; Stowell, C.; Woolaway-Bickel, K.; Rose, M.

**DOI**

[10.1007/s11136-017-1659-5](https://doi.org/10.1007/s11136-017-1659-5)

**Publication date**

2017

**Document Version**

Other version

**Published in**

Quality of Life Research

[Link to publication](#)

**Citation for published version (APA):**

Obbarius, A., van Maasackers, L., Baer, L., Clark, D. M., Crocker, A. G., de Beurs, E., Emmelkamp, P. M. G., Furukawa, T. A., Hedman-Lagerlöf, E., Kangas, M., Langford, L., Lesage, A., Mwesigire, D. M., Nolte, S., Patel, V., Pilkonis, P. A., Pincus, H. A., Reis, R. A., Rojas, G., ... Rose, M. (2017). Standardization of health outcomes assessment for depression and anxiety: Recommendations from the ICHOM Depression and Anxiety Working Group. *Quality of Life Research*, 26(12), 3211-3225. <https://doi.org/10.1007/s11136-017-1659-5>

**General rights**

It is not permitted to download or to forward/distribute the text or part of it without the consent of the author(s) and/or copyright holder(s), other than for strictly personal, individual use, unless the work is under an open content license (like Creative Commons).

**Disclaimer/Complaints regulations**

If you believe that digital publication of certain material infringes any of your rights or (privacy) interests, please let the Library know, stating your reasons. In case of a legitimate complaint, the Library will make the material inaccessible and/or remove it from the website. Please Ask the Library: <https://uba.uva.nl/en/contact>, or a letter to: Library of the University of Amsterdam, Secretariat, P.O. Box 19185, 1000 GD Amsterdam, The Netherlands. UvA-DARE is a service provided by the library of the University of Amsterdam (<https://dare.uva.nl>). You will be contacted as soon as possible.

# ICHOM Baseline Assessment for Depression and Anxiety v1

The following questions will assess your current health status helping your health care provider to monitor the treatment success and to acknowledge potential health risk factors.

| WHODAS 2.0 | In the past 30 days, how much difficulty did you have in:                                                                                                        | None                     | Mild                     | Moderate                 | Severe                   | Extreme or cannot do     |
|------------|------------------------------------------------------------------------------------------------------------------------------------------------------------------|--------------------------|--------------------------|--------------------------|--------------------------|--------------------------|
| 1          | Standing for long periods such as 30 minutes?                                                                                                                    | <input type="checkbox"/> |
| 2          | Taking care of your household responsibilities?                                                                                                                  | <input type="checkbox"/> |
| 3          | Learning a new task, for example, learning how to get to a new place?                                                                                            | <input type="checkbox"/> |
| 4          | How much of a problem did you have joining in community activities (for example, festivities, religious or other activities) in the same way as anyone else can? | <input type="checkbox"/> |
| 5          | How much have you been emotionally affected by your health problems?                                                                                             | <input type="checkbox"/> |
| 6          | Concentrating on doing something for ten minutes?                                                                                                                | <input type="checkbox"/> |
| 7          | Walking a long distance such as a kilometer [or equivalent]?                                                                                                     | <input type="checkbox"/> |
| 8          | Washing your whole body?                                                                                                                                         | <input type="checkbox"/> |
| 9          | Getting dressed?                                                                                                                                                 | <input type="checkbox"/> |
| 10         | Dealing with people you do not know?                                                                                                                             | <input type="checkbox"/> |
| 11         | Maintaining a friendship?                                                                                                                                        | <input type="checkbox"/> |
| 12         | Your day-to-day work?                                                                                                                                            | <input type="checkbox"/> |
| PHQ-9      | Over the last 2 weeks how often have you been bothered by any of the following problems?                                                                         | Not at all               | Several days             | More than half the days  | Nearly every day         |                          |
| 1          | Little interest or pleasure doing thing                                                                                                                          | <input type="checkbox"/> | <input type="checkbox"/> | <input type="checkbox"/> | <input type="checkbox"/> |                          |
| 2          | Feeling down, depressed, or hopeless                                                                                                                             | <input type="checkbox"/> | <input type="checkbox"/> | <input type="checkbox"/> | <input type="checkbox"/> |                          |
| 3          | Trouble falling or staying asleep, or sleeping too much                                                                                                          | <input type="checkbox"/> | <input type="checkbox"/> | <input type="checkbox"/> | <input type="checkbox"/> |                          |
| 4          | Feeling tired or having little energy                                                                                                                            | <input type="checkbox"/> | <input type="checkbox"/> | <input type="checkbox"/> | <input type="checkbox"/> |                          |
| 5          | Poor appetite                                                                                                                                                    | <input type="checkbox"/> | <input type="checkbox"/> | <input type="checkbox"/> | <input type="checkbox"/> |                          |
| 6          | Feeling bad about yourself – or that you are a failure or have let yourself or your family down                                                                  | <input type="checkbox"/> | <input type="checkbox"/> | <input type="checkbox"/> | <input type="checkbox"/> |                          |
| 7          | Trouble concentrating on things, such as reading the newspaper or watching television                                                                            | <input type="checkbox"/> | <input type="checkbox"/> | <input type="checkbox"/> | <input type="checkbox"/> |                          |
| 8          | Moving or speaking slowly that other people could have noticed. Or the opposite – being so fidgety or restless that you have been moving a lot more than usual   | <input type="checkbox"/> | <input type="checkbox"/> | <input type="checkbox"/> | <input type="checkbox"/> |                          |
| 9          | Thoughts that you would be better off dead, or hurting yourself in some way                                                                                      | <input type="checkbox"/> | <input type="checkbox"/> | <input type="checkbox"/> | <input type="checkbox"/> |                          |

| GAD-7                                                                                    |                                                   | Not at all               | Several days             | More than half the days  | Nearly every day         |
|------------------------------------------------------------------------------------------|---------------------------------------------------|--------------------------|--------------------------|--------------------------|--------------------------|
| Over the last 2 weeks how often have you been bothered by any of the following problems? |                                                   |                          |                          |                          |                          |
| 1                                                                                        | Feeling nervous, anxious, or on edge              | <input type="checkbox"/> | <input type="checkbox"/> | <input type="checkbox"/> | <input type="checkbox"/> |
| 2                                                                                        | Not being able to stop or control worrying        | <input type="checkbox"/> | <input type="checkbox"/> | <input type="checkbox"/> | <input type="checkbox"/> |
| 3                                                                                        | Worrying too much about different things          | <input type="checkbox"/> | <input type="checkbox"/> | <input type="checkbox"/> | <input type="checkbox"/> |
| 4                                                                                        | Trouble relaxing                                  | <input type="checkbox"/> | <input type="checkbox"/> | <input type="checkbox"/> | <input type="checkbox"/> |
| 5                                                                                        | Being so restless that it's hard to sit still     | <input type="checkbox"/> | <input type="checkbox"/> | <input type="checkbox"/> | <input type="checkbox"/> |
| 6                                                                                        | Becoming easily annoyed or irritable              | <input type="checkbox"/> | <input type="checkbox"/> | <input type="checkbox"/> | <input type="checkbox"/> |
| 7                                                                                        | Feeling afraid as if something awful might happen | <input type="checkbox"/> | <input type="checkbox"/> | <input type="checkbox"/> | <input type="checkbox"/> |

| MOS-SSS                                                                                                                                                                        |                                                                              | None of the time         | A little of the time     | Some of the time         | Most of the time         | All of the time          |
|--------------------------------------------------------------------------------------------------------------------------------------------------------------------------------|------------------------------------------------------------------------------|--------------------------|--------------------------|--------------------------|--------------------------|--------------------------|
| People sometimes look to others for companionship, assistance, or other types of support. How often is each of the following kinds of support available to you if you need it? |                                                                              |                          |                          |                          |                          |                          |
| 1                                                                                                                                                                              | Someone to share your most private worries and fears with                    | <input type="checkbox"/> |
| 2                                                                                                                                                                              | Someone to turn to for suggestions about how to deal with a personal problem | <input type="checkbox"/> |
| 3                                                                                                                                                                              | Someone to do something enjoyable with                                       | <input type="checkbox"/> |
| 4                                                                                                                                                                              | Someone to love and make you feel wanted                                     | <input type="checkbox"/> |

|                                                                                              |                                                    |                                                        |
|----------------------------------------------------------------------------------------------|----------------------------------------------------|--------------------------------------------------------|
| Have you been told by a doctor that you have any of the following chronic health conditions? |                                                    |                                                        |
| <input type="checkbox"/> I have no chronic condition                                         |                                                    |                                                        |
| <input type="checkbox"/> Heart disease                                                       | <input type="checkbox"/> High blood pressure       | <input type="checkbox"/> Leg pain when walking         |
| <input type="checkbox"/> Lung disease                                                        | <input type="checkbox"/> Diabetes                  | <input type="checkbox"/> Kidney disease                |
| 1 <input type="checkbox"/> Liver disease                                                     | <input type="checkbox"/> Problems caused by stroke | <input type="checkbox"/> Disease of the nervous system |
| <input type="checkbox"/> Cancer (within the last 5 yrs)                                      | <input type="checkbox"/> Anxiety Disorder          | <input type="checkbox"/> Depression                    |
| <input type="checkbox"/> Arthritis                                                           | <input type="checkbox"/> Substance abuse           | <input type="checkbox"/> Somatoform disorder           |
| <input type="checkbox"/> Personality disorder                                                | <input type="checkbox"/> Chronic pain disorder     | <input type="checkbox"/> Schizophrenic disorder        |

|                                   |                                                                                                                                                                                                                                            |
|-----------------------------------|--------------------------------------------------------------------------------------------------------------------------------------------------------------------------------------------------------------------------------------------|
| Health status and prior treatment |                                                                                                                                                                                                                                            |
| 1                                 | How many months have you been experiencing symptoms of depression/anxiety? _____ (# of month)<br>Did you experience similar episodes of depression or anxiety before in your life?                                                         |
|                                   | <input type="checkbox"/> This is my first episode                                                                                                                                                                                          |
| 2                                 | <input type="checkbox"/> I had one similar episode before the current one<br><input type="checkbox"/> I had several similar episodes before the current one<br><input type="checkbox"/> My symptoms of depression do not occur in episodes |
| 3                                 | During the last year, did you receive any of the following treatments for depression/anxiety?                                                                                                                                              |
|                                   | medication <input type="checkbox"/> no <input type="checkbox"/> 1-3 months <input type="checkbox"/> 3-6 months <input type="checkbox"/> more than 6 months                                                                                 |
| 4                                 | psychological treatment <input type="checkbox"/> no <input type="checkbox"/> 1-3 months <input type="checkbox"/> 3-6 months <input type="checkbox"/> more than 6 months                                                                    |
| 5                                 | other <input type="checkbox"/> no <input type="checkbox"/> 1-3 months <input type="checkbox"/> 3-6 months <input type="checkbox"/> more than 6 months                                                                                      |

6 If you took any medication for depression/anxiety, did you take your medication as prescribed?

- no  mostly  yes

Did you experience medication side-effects?  yes  no

If Yes, please indicate which side-effects you have experienced:

- 7  Weight gain  Sexual dysfunction  Sleep disturbances  
 Dry mouth  Drowsiness/sedation  Cardiovascular side-effects (e.g. palpitations)  
 Gastrointestinal side-effects (e.g. diarrhea, nausea, vomiting)  Other: \_\_\_\_\_

How successful do you think your current therapy will be in reducing your symptoms?

- 8  Not at all successful  Somewhat successful  
 Moderately successful  Very successful

### Demographic factors

1 What is your date of birth? \_\_\_\_\_ (dd/mm/yyyy)

2 Please indicate your sex at birth  male  female  do not want to answer

Please indicate highest level of schooling completed (ISCED 1997)

- 3  none  grade 1-6  grade 7-9  High school  
 Vocational certificate  Bachelor/Master  Ph.D.

Which statement best describes your living arrangements?

- 4  with partner/spouse/family/friends  alone  
 nursing home/hospital/long term care home  other

What is your work status?

- 5  Unable to work (due to a condition other than depression or anxiety)  Unable to work (due to depression or anxiety)  
 Not working by choice (student, retired, homemaker)  Working part-time  
 Seeking employment (I consider myself able to work but cannot find a job)  Working full-time

6 How many working days have you missed within the last month due to illness? \_\_\_\_\_ (# of days)
